# Supplementary material for: Origanum majorana L. Extract Attenuated Benign Prostatic Hyperplasia in Rat Model: Effect on Oxidative Stress, Apoptosis, and Proliferation
Source: MDPI journal article supplement (doi:10.3390/antiox11061149), 2022-06-11
Supplement: s1 [file s1]

## Supplementary materials

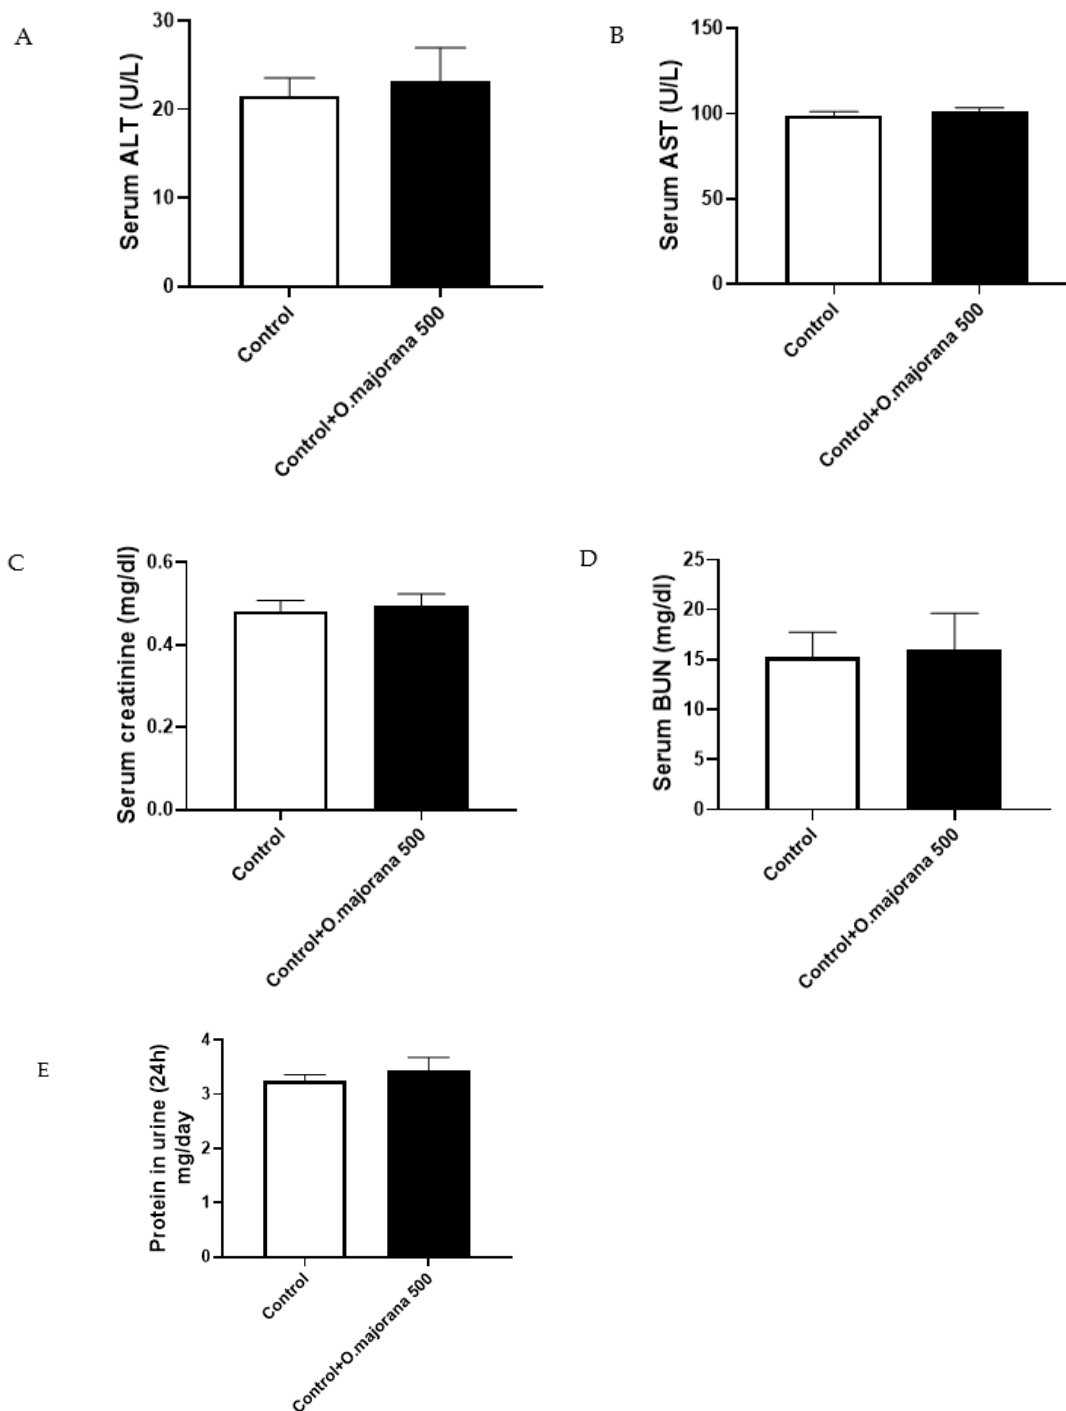

**Figure S1.** Effect of *O. majorana* (500 mg/kg/day) on (A) serum alanine aminotransferase (ALT), (B) serum aspartate aminotransferase (AST), (C) serum creatinine, (D) blood urea nitrogen (BUN), (E) protein in urine when administrated to normal control group.

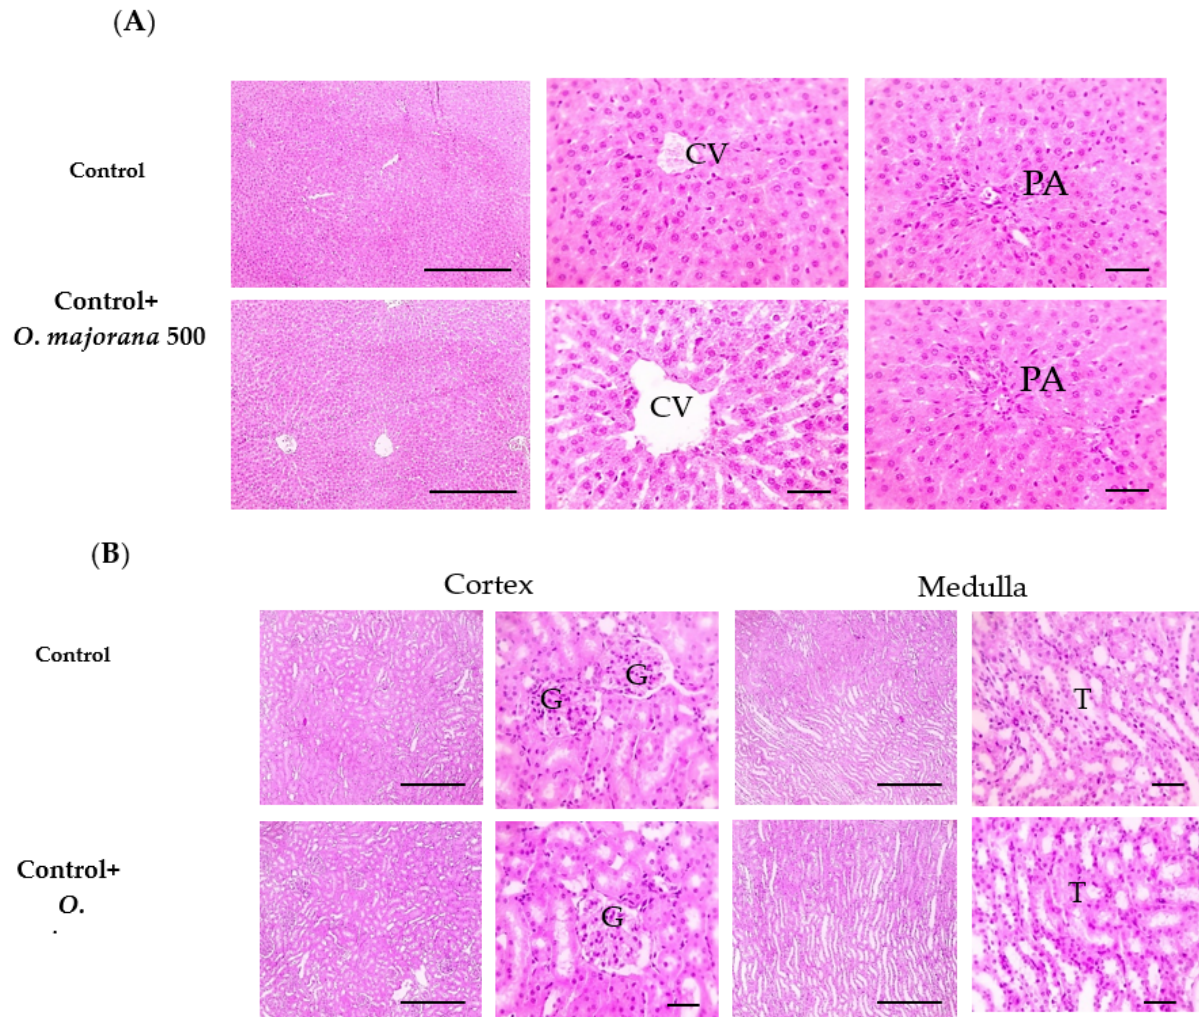

**Figure S2.** (A) Microscopic pictures of H&E-stained hepatic sections showing normal hepatocytes, central vein (CV) and portal areas (PA) in control group, and control treated with *O. majorana* 500mg/kg/day . Low magnification X: 100 bar 100 and high magnification X: 400 bar 50. (B) Microscopic pictures of H&E-stained renal sections showing normal cortex including glomeruli (G) and tubules (T) and medulla in control group and control treated with *O. majorana* 500mg/kg/day. Low magnification X: 100 bar 100 and high magnification X: 400 bar 50.
